# Supplementary material for: Recurrent NUS1 canonical splice donor site mutation in two unrelated individuals with epilepsy, myoclonus, ataxia and scoliosis - a case report
Source: Springer Nature journal article supplement (doi:10.1186/s12883-019-1489-x), 2019-10-27

8y

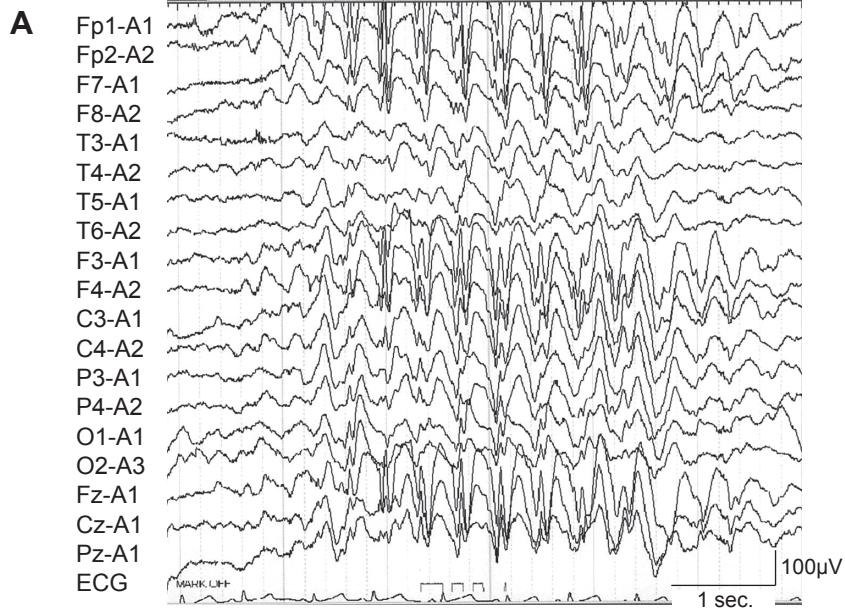

17y

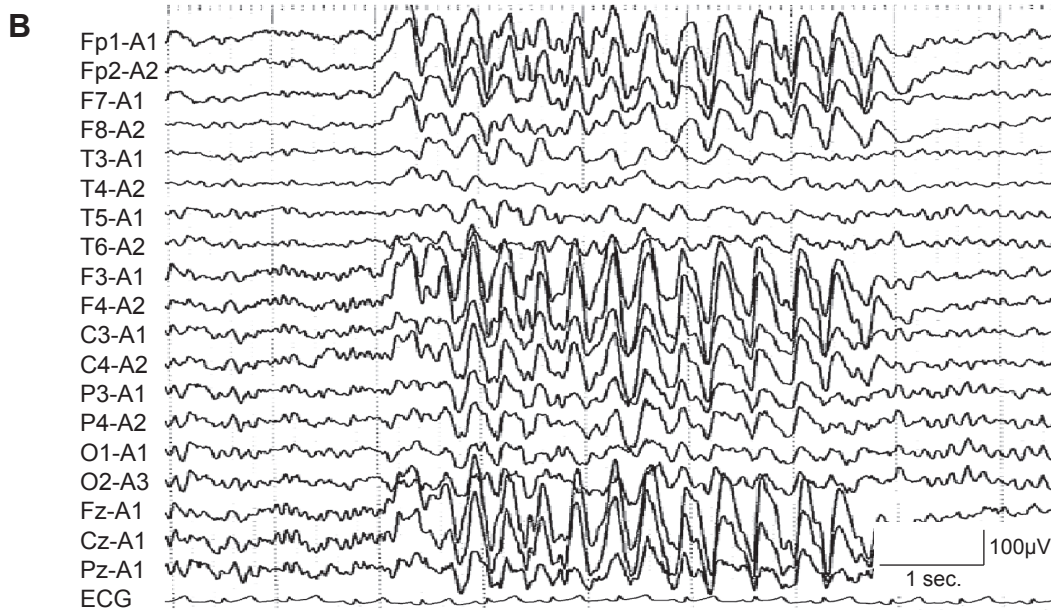

6y

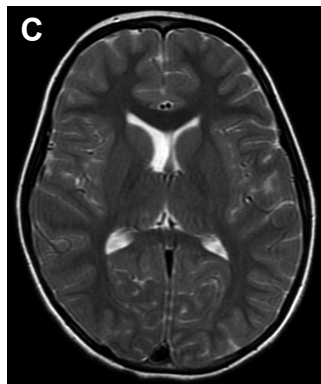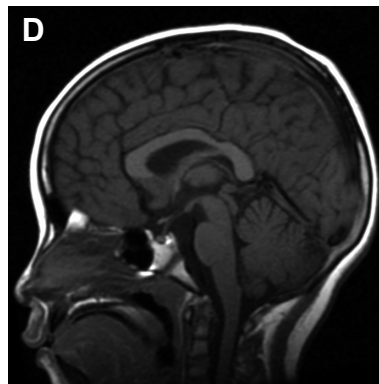

15y

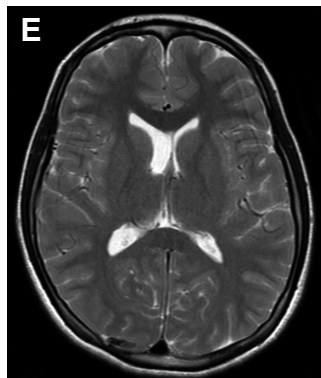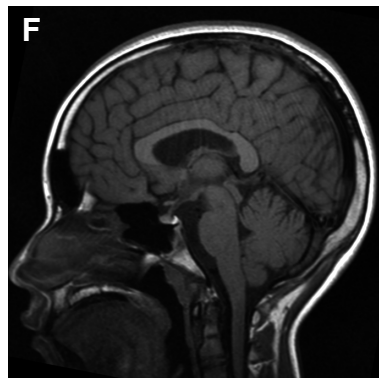

Supplement: MOESM1 [file 17311168]
